# Supplementary material
Source: publisher figshare collection journal article supplement (https://gsajournals.figshare.com/ndownloader/files/15230711)
Supplement: Supplementary file 1 [file 15230711]

## Sheet: Sheet1
Table S1: Table of Accession numbers for sequences used to reconstruct phylogeny
Species	COI	COII	COIII	cytb	ADH	AMYREL	AMY	per	Ddc	Sod	BOSS	hb	snf	wee	marf	fkh
C. amoena	HQ979021.1	AF478415.1	EU493831.1	EU494086.1	AF059887.1	AY736544.1	-	-	AY124490.1	X61687.1	-	-	-	-	-	-
C. procnemis	GU597449.1	HQ110556.1	GU597512.1	-	AB026521.1	-	-	-	-	AF021821.1	-	-	-	-	-	-
D. busckii	HG798345.1	AF519347.1	AF519379.1	-	AB261141.1	-	AF071037.1	-	AF293733.1	U39445.1	-	-	-	-	-	-
D. pseudotalamancana	KF632610.1	-	-	-	-	KF632685.1	KF632699.1	-	-	-	KF632674.1	-	KF632636.1	KF632624.1	KF632650.1	KF632664.1
D. bromeliae	KF632602.1	AF478418.1	-	-	AY081441.1	AY733049.1	KF632689.1	-	AF324966.1	-	KF632666.1	-	KF632627.1	KF632614.1	KF632640.1	KF632654.1
D. arawakana	HM006881.1	HM006889.1	-	-	AY695384.1	AF491630.1	AF071036.1	-	EU446060.1	-	-	EU447305.1	-	-	-	-
D. cardini	HM006874.1	HM006890.1	AF519351.1	EU494092.1	AY695386.1	AF462599.1	-	-	EU446063.1	-	-	EU447308.1	-	-	-	-
D. dunni	HM006882.1	HM006893.1	EU493838.1	EU494093.1	AY695382.1	-	-	-	HM006868.1	-	-	HM006872.1	-	-	-	-
D. polymorpha	HM006879.1	HM006892.1	-	-	-	AY736495.1	-	-	EU446098.1	-	-	EU447339.1	-	-	-	-
D. funebris	KF632605.1	EF469563.1	EU493840.1	EU494095.1	Y17611.1	AF335557.1	KF632692.1	-	AF293734.1	AF059878.1	KF632669.1	EU447312.1	KF632629.1	KF632617.1	KF632643.1	KF632657.1
D. guarani	EU493582.1	EU493712.1	EU493843.1	EU494098.1	AY081439.1	-	-	-	EU446091.1	-	-	EU450643.1	-	-	-	-
D. guttifera	GU597465.1	AF147119.1	GU597529.1	EU494119.1	AB261139.1	-	-	-	-	AF021826.1	-	-	-	-	-	-
D. albomicans	AY633553.1	-	-	EU494100.1	AY044126.1	AF462595.1	-	AF102153.1	-	-	-	-	-	-	-	-
D. hypocausta	EU493585.1	-	EU493845.1	EU494101.1	AY044131.1	AY733043.1	-	-	-	-	-	-	-	-	-	-
D. immigrans	HQ979108.1	EU493716.1	EU493846.1	EU494102.1	M97638.1	AF491632.1	-	L06337.1	AF293738.1	AF021825.1	-	EU447316.1	-	-	-	-
D. kepulauana	EU493587.1	EU493717.1	EU493847.1	EU494103.1	-	AY733044.1	-	AF102154.1	-	-	-	-	-	-	-	-
D. kohkoa	EU493588.1	EU493718.1	EU493848.1	EU494104.1	AY044124.1	-	-	AF102160.1	-	-	-	-	-	-	-	-
D. nasuta	GU597466.1	GU597498.1	EU493849.1	EU494105.1	AB261137.1	AY733059.1	U31135.1	AF102159.1	-	HQ326583.1	-	-	-	-	-	-
D. neohypocausta	EU493590.1	-	EU493850.1	EU494106.1	AB261134.1	-	-	-	-	-	-	-	-	-	-	-
D. rubida	EU493593.1	EU493723.1	EU493853.1	EU494109.1	-	AY736502.1	-	-	-	-	-	-	-	-	-	-
D. euronotus	GU597454.1	EU390743.1	GU597516.1	-	AY750132.1	-	-	-	-	-	-	-	-	-	-	-
D. melanica	KJ463784.1	EU390749.1	EU493871.1	EU494125.1	AY750123.1	AY733056.1	-	-	AF324972.1	AF059880.1	-	-	-	-	-	-
D. micromelanica	AY750096.1	EU390751.1	EU493872.1	EU494126.1	AY750124.1	-	-	-	-	-	-	-	-	-	-	-
D. paramelanica	AY750099.1	EU493742.1	GU597515.1	EU494127.1	AY750127.1	-	-	-	-	-	-	-	-	-	-	-
D. acanthoptera	KF632601.1	EU493728.1	EU493858.1	-		KF632675.1	KF632687.1	-	-	-	JF736442.1	-	JF736382.1	KF632612.1	KF632638.1	KF632652.1
D. nannoptera	DQ471531.1	AF183971.1	AF183976.1	EU494114.1	DQ471666.1	KF632682.1	KF632696.1	-	AF324975.1	AY081433.1	JF736456.1	-	KF632633.1	KF632621.1	KF632647.1	KF632661.1
D. pachea	KF632609.1	KF632600.1	AF183975.1	-	-	KF632683.1	KF632697.1	-	JX067180.1	-	KF632672.1	-	KF632634.1	KF632622.1	KF632648.1	KF632662.1
D. pallidipennis	EF570011.1	AY162982.1	EU493860.1	EU494115.1	-	AY736487.1	-	-	EU446092.1	-	-	EU447332.1	-	-	-	-
D. polychaeta	DQ471555.1	EU493733.1	EU493863.1	EU494118.1	DQ471629.1	AY736494.1	-	-	AF324976.1	-	-	-	-	-	-	-
D. palustris	AF147112.1	AF147122.1	AF147132.1	-	-	AY736538.1	-	-	-	-	-	-	-	-	-	-
D. phalerata	AF147105.1	AF147115.1	AF147125.1	-	JF735884.1	AY736492.1	-	-	AF293745.1	-	-	-	-	-	-	-
D. subpalustris	AF147111.1	AF147121.1	AF147131.1	-	-	AY736539.1	-	-	-	-	-	-	-	-	-	-
D. anceps	DQ471598.1	JF736093.1	-	-	DQ471656.1	-	-	-	-	-	JF736443.1	-	JF736383.1	JF736260.1	JF736208.1	-
D. arizonae	DQ383684.1	DQ436072.1	-	-	AY154863.1	-	-	-	-	-	JF736487.1	-	JF736425.1	JF736304.1	EU341636.1	JF736194.1
D. buzzatii	KF632603.1	AF146169.1	AF146181.1	-	U65746.1	KF632677.1	KF632690.1	-	AF324980.1	-	KF632667.1	-	JF736384.1	KF632615.1	KF632641.1	KF632655.1
D. eohydei	DQ471601.1	JF736124.1	AF145893.1	-	DQ471659.1	-	-	-	AF324970.1	-	JF736490.1	-	JF736429.1	JF736308.1	JF736245.1	JF736197.1
D. hydei	DQ471603.1	AF145888.1	AF145892.1	-	DQ471660.1	AY733042.1	AF071035.1	-	AF293737.1	U37714	JF736448.1	EF559361.1	JF736388.1	JF736265.1	JF736212.1	JF736170.1
D. limensis	JF736082.1	JF736123.1	-	-	-	AY736479.1	AF071046.1	-	-	-	JF736488.1	-	JF736426.1	JF736305.1	JF736242.1	-
D. mayaguana	DQ202067.1	DQ202027.1	-	-	M62742.1	-	-	-	-	-	JF736451.1	AY155063.1	JF736392.1	JF736269.1	EU341634.1	JF736172.1
D. mercatorum	HG798344.1	EU493737.1	EU493867.1	EU494121.1	DQ471664.1	-	U31133.1	-	AF324973.1	-	JF736484.1	-	JF736422.1	JF736301.1	JF736239.1	JF736191.1
D. mojavensis	DQ383730.1	AY437281.1	EU493868.1	EU494122.1	AY364493.1?	-	AF071041.1	FJ267300.1	-	-	JF736454.1	-	AY437368.1	JF736272.1	AY437326.1	JF736173.1
D. mulleri	DQ437708.1	AY437294.1	DQ437714.1	-	U76483.1	-	-	-	AF324974.1	-	JF736455.1	AY155113.1	JF736396.1	JF736273.1	EU341638.1	JF736174.1
D. navojoa	EU493609.1	DQ436089.1	EU493869.1	EU494123.1	X15585.1	-	-	-	-	-	JF736477.1	-	JF736415.1	JF736294.1	EU341635.1	JF736189.1
D. repleta	DQ471533.1	GQ376044.1	-	-	DQ471667.1	AY736496.1	AF048776.1	-	AF324977.1	-	JF736463.1	-	JF736403.1	JF736281.1	EU341630.1	-
D. lacertosa	AY750095.1	EU493740.1	-	EU494124.1	DQ471652.1	-	-	-	-	-	-	-	-	-	-	-
D. robusta	EU390726.1	GQ244457.1	GU597514.1	EU494128.1	AY750138.1	KF632684.1	KF632698.1	L06340.1	AF293747.1	AF059883.1	KF632673.1	-	KF632635.1	KF632623.1	KF632649.1	KF632663.1
D. sordidula	EU493580.1	EU390759.1	EU493841.1	EU494096.1	AY750139.1	-	-	-	AF324979.1	-	-	-	-	-	-	-
D. mediopictoides	EU493617.1	EU493746.1	-	EU494131.1	-	AY733055.1	-	-	EU446080.1	-	-	EU447323.1	-	-	-	-
D. tripunctata	EU493619.1	EU493748.1	AF519375.1	EU494133.1	AY081440.1	-	-	-	AF324964.1	-	-	EU447342.1	-	-	-	-
D. borealis	KJ463779.1	GQ244452.1	-	-	U26839.1	-	-	-	-	-	-	-	-	-	-	-
D. ezoana	DQ471600.1	-	-	-	DQ471658.1	-	-	AY854880.1	-	-	-	EF635087.1	-	-	-	-
D. flavomontana	JF735925.1	JF735932.1	-	-	U26838.1	-	-	-	-	-	-	-	-	-	-	-
D. kanekoi	DQ471604.1	GQ244455.1	-	-	JF710263.1	AY736535.1	-	-	-	-	-	-	-	-	-	-
D. lacicola	JF735927.1	JF735933.1	-	-	U26841.1	-	-	-	-	-	-	-	-	-	-	-
D. littoralis	JN019910.1	NC_011596.1	NC_011596.1	NC_011596.1	DQ471662.1	AY733045.1	AF071047.1	EF635096.1	-	-	-	EF635088.1	-	-	-	-
D. lummei	DQ471606.1	AY646746.1	-	AY646770.1	U26843.1	AY733046.1	-	-	-	-	-	-	-	-	-	-
D. montana	DQ426756.1	DQ426799.1	EU493880.1	-	DQ471665.1	-	-	EF635097.1	-	-	-	EF635089.1	-	-	-	-
D. novamexicana	JF735929.1	JF735934.1	-	AY646767.1	AY165542.1	AY736484.1	-	-	AY165545.1	-	-	-	-	-	-	-
D. virilis	JQ679111.1	HQ110559.1	-	AY646772.1	DQ471668.1	AF136603.1	U02029.1	X13877.1	AF293749.1	X13831.1	JF736479.1	EF635085.1	JF736417.1	JF736296.1	JF736234.1	XM_002058672.1
D. ananassae	AB032132.1	AF474077.1	BK006336.1	EU601718.1	AB194426.1	AF024691.3	AB003755.1	L06335.1	HQ631615.1	-	-	HQ631746.1	-	-	-	-
D. atripex	FJ795575.1	-	-	EU601556.1	-	U96154.3	-	-	-	-	-		-	-	-	-
D. auraria	AB669696.1	AB243377.1	EU493883.1	EU494137.1	AB669826.1	U96163.2	AB048693.1	-	HQ631616.1	-	-	AF461338.1	-	-	-	-
D. baimaii	AB669751.1	AB669808.1	EU493884.1	EU494138.1	AB669881.1	HQ631506.1	AB048800.1	-	HQ631617.1	-	-	HQ631748.1	-	-	-	-
D. bipectinata	AB032131.1	AY757275.1	-	-	DQ363233.1	AF136936.1	U31145.1	-	DQ363227.1	AJ844862.1	-	HQ631752.1	-	-	-	-
D. birchii	AB669745.1	AB669803.1	-	-	AB669876.1	HQ631507.1	AB048804.1	-	HQ631620.1	-	-	AF461340.1	-	-	-	-
D. bunnanda	AB669747.1	GQ376040.1	-	-	AB669877.1	-	-	-	-	-	-		-	-	-	-
D. elegans	AB032130.1	HQ631610.1	-	-	DQ363230.1	AF136930.2	AY098451.1	-	DQ363224.1	-	-	HQ631756.1	-	-	-	-
D. ercepeae	FJ795576.1	AF461306.1	-	-	AF459784.1	U96155.2	U31137.1	-	-	-	-	AF461354.1	-	-	-	-
D. erecta	JQ679121.1	GQ244453.1	-	-	X54116.1	AF039562.2	M55996.1	AF251239.1	-	AF127156.1	-		-	-	-	-
D. eugracilis	AY098461.1	AF474079.1	-	-	AY279326.1	AF250055.1	AB003764.1	-	DQ363225.1	-	-	HQ631757.1	-	-	-	-
D. ficusphila	AY757285.1	AY757273.1	-	-	DQ363232.1	AF462600.1	AB003765.1	-	DQ363226.1	-	-	HQ631758.1	-	-	-	-
D. fuyamai	AY098460.1	HQ631608.1	-	-	HQ631474.1	HQ631511.1	AB003768.1	-	HQ631624.1	-	-	HQ631759.1	-	-	-	-
D. kanapiae	AB669755.1	AB669812.1	-	-	AB669885.1	-	AB048768.1	-	-	-	-	AF461349.1	-	-	-	-
D. lacteicornis	AB830535.1	AB243388.1	-	-	AB830534.1	-	AB048769.1	-	-	-	-		-	-	-	-
D. lucipennis	HQ631564.1	HQ631607.1	-	-	AF459751.1	AF251138.1	AY098452.1	-	HQ631629.1	-	-	HQ631764.1	-	-	-	-
D. lutescens	AB027267.1	AF474090.1	-	-	AY279327.1	AF491637.1	HQ631491.1	-	HQ631630.1	-	-	AF461318.1	-	-	-	-
D. malerkotliana	AY757289.1	EU493756.1	EU493886.1	EU494140.1	AB194422.1	AY733053.1	HQ631504.1	-	HQ631632.1	AJ844839.1	-	AF461326.1	-	-	-	-
D. mauritiana	M57907.1	AF474081.1	NC_005779.1	NC_005779.1	AF284479.1	JF815750.1	D17730.1	AF251240.1	-	AF127158.1	-		-	-	-	-
D. mayri	AB669757.1	AB669814.1	-	-	AB669887.1	HQ631514.1	AB048771.1	-	HQ631633.1	-	-	AF461350.1	-	-	-	-
D. melanogaster	M57910.1	EU493757.1	GQ229522.1	NC_024511.2	U20765.1	NM_057914.4	L22716.1	L22716.1	HQ631634.1	X17332.1	-	HQ631766.1	-	-	-	J03177.1
D. mimetica	AY098454.1	AF474092.1	-	-	AY279328.1	AY733058.1	AY098447.1	-	-	-	-	AF461320.1	-	-	-	-
D. nikananu	AB669744.1	AB669801.1	-	-	AB669874.1	AF251136.1	AB048775.1	-	-	-	-	AF461337.1	-	-	-	-
D. orena	AY757281.1	AY757269.1	-	-	-	U96158.2	D21129.1	AF251242.1	-	AF127155.1	-		-	-	-	-
D. orosa	AB669758.1	AB669815.1	-	-	AB669888.1	-	AB048776.1	-	-	-	-	AF461351.1	-	-	-	-
D. pallidosa	FJ795561.1	AF461280.1	-	EU601680.1	AF459759.1	AF136931.1	-	-	-	-	-	AF461327.1	-	-	-	-
D. parabipectinata	AY757282.1	AY757270.1	-	-	HQ631481.1	AY736489.1	HQ631503.1	-	HQ631637.1	-	-	HQ631769.1	-	-	-	-
D. paralutea	AY757290.1	AY757278.1	-	-	AF459747.1	-	-	-	-	-	-	AF461315.1	-	-	-	-
D. pectinifera	AB669761.1	AB243390.1	-	-	AB669891.1	-	-	-	-	-	-		-	-	-	-
D. phaeopleura	AY757291.1	AY757279.1	-	EU601555.1	AF459756.1	AY736491.1	-	-	-	-	-	AF461324.1	-	-	-	-
D. prostipennis	HQ631570.1	AF474091.1	-	-	HQ631483.1	HQ631519.1	HQ631494.1	-	HQ631641.1	-	-	HQ631773.1	-	-	-	-
D. pseudoananassae nigrens	AJ844809.1	-	-	-	AB194424.1	AY736497.1	-	-		-	-		-	-	-	-
D. pseudoananassae	AY757280.1	GQ376041.1	-	-	AB194425.1	AY736498.1	AB003774.1	-	HQ631639.1	-	-	HQ631771.1	-	-	-	-
D. pseudotakahashii	AY757283.1	AY757271.1	-	-	-	AY736499.1	-	-		-	-		-	-	-	-
D. punjabiensis	AB669723.1	AB243401.1	-	-	AB669854.1	U96165.1	AB048772.1	-	HQ631643.1	-	-	HQ631775.1	-	-	-	-
D. quadraria	AB669703.1	AB243392.1	-	-	AB669833.1	AF136934.1	AB048698.1	-	HQ631644.1	-	-	AF461343.1	-	-	-	-
D. rufa	AB669704.1	AB243394.1	-	-	AB669834.1	AF136935.2	AB048779.1	-	HQ631645.1	-	-	AF461353.1	-	-	-	-
D. santomea	JQ679120.1	DQ382822.1	NC_023825.1	NC_023825.1	AY804554.1	AY736503.1	AF280885.1	AF251248.1	-	AY804512.1	-	AY804682.1	-	-	-	-
D. sechellia	M57908.1	GQ244458.1	NC_005780.1	NC_005780.1	AF284481.1	AF039558.1	D17732.1	AF251249.1	-	AF127157.1	-	XM_002031972.1	-	-	-	-
D. seguyi	AB669716.1	AB669775.1	-	-	AB669846.1	HQ631522.1	AB048780.1	-	HQ631646.1	-	-	AF461335.1	-	-	-	-
D. serrata	AB669748.1	AB669806.1	-	-	AB669879.1	AF069756.1	AB048781.1	L06341.1	HQ631647.1	-	-		-	-	-	-
D. simulans	M57911.1	GQ222022.1	NC_005781.1	NC_005781.1	M36581.1	XM_002081767.1	D17734.1	AF251250.1	AY197770.1	X15685.1	-	HQ631776.1	-	-	-	-
D. suzukii	AB032128.1	HQ631606.1	-	-	-	HQ631524.1	AY098448.1	-	HQ631649.1	-	-	HQ631778.1	-	-	-	-
D. takahashii	JF735911.1	AF474089.1	-	-	AF459749.1	U96161.2	U31148.1	-	HQ631650.1	-	-	HQ631779.1	-	-	-	-
D. tani	AB669709.1	AB669770.1	-	-	AB669839.1	HQ631525.1	AB048700.1	-	HQ631651.1	-	-	HQ631780.1	-	-	-	-
D. teissieri	JQ679119.1	DQ382787.1	-	-	X54118.1	AF039557.2	D17736.1	AF251251.1	-	AF127160.1	-	AF461329.1	-	-	-	-
D. triauraria	AB669711.1	AB243399.1	-	-	AB669841.1	AF251141.1	AB048694.1	-	HQ631653.1	-	-	HQ631782.1	-	-	-	-
D. tsacasi	AB669717.1	AB669776.1	-	-	AB669847.1	AF251134.1	AB048783.1	-	-	-	-	AF461346.1	-	-	-	-
D. varians	FJ795579.1	AF461276.1	-	-	AB194427.1	AF136937.2	-	-	-	-	-	AF461323.1	-	-	-	-
D. vulcana	AB669718.1	AB669777.1	-	-	AB669848.1	AF251132.1	AB048785.1	-	-	-	-	AF461336.1	-	-	-	-
D. yakuba	X03240.1	X03240.1	X03240.1	X03240.1	X57376.1	AF039561.2	D17738.1	X61127.1	-	AF127159.1	-	AF461330.1	-	-	-	-
D. affinis	HQ979106.1	GQ244451.1	AF519378.1	EF216263.1	AY754404.1	AF037353.1	AF037099.1	-	AY754448.1	U47879.1	-	AF461312.1	-	-	-	-
D. algonquin	JF735923.1	M95144.1	-	U07279.1	AB703316.1	-	-	-	-	-	-		-	-	-	-
D. ambigua	U51610.1	EU493759.1	EU493889.1	EF216264.1	AB703317.1	AF306712.1	AF037092.1	-	-	U47868.1	-	AF461309.1	-	-	-	-
D. azteca	U51605.1	M95146.1	-	U07283.1	AB703319.1	AF150685.1	AF074822.1	-	-	U47866.1	-		-	-	-	-
D. barbarae	AB669728.1	AB669785.1	EU493885.1	EU494139.1	AB669858.1	AF250053.1	AB048802.1	-	HQ631618.1	-	-	HQ631749.1	-	-	-	-
D. biauraria	AB669697.1	AB243383.1	-	-	AB669828.1	AF136932.2	AF393786.1	-	HQ631619.1	-	-	HQ631751.1	-	-	-	-
D. bicornuta	AB669753.1	AB669810.1	-	-	AB669883.1	AF136933.1	-	-	-	-	-	AF461331.1	-	-	-	-
D. bifasciata	AF050749.1	M95147.1	EU493891.1	EU494145.1	AB703320.1	AF251135.1	AF037104.1	-	-	U47869.1	-	AF461313.1	-	-	-	-
D. diplacantha	AB669732.1	AB669789.1	-	-	AB669862.1	AF251142.1	AB048764.1	-	-	-	-	AF461332.1	-	-	-	-
D. greeni	AB669713.1	AB669772.1	-	-	AB669843.1	AF462602.1	AF393792.1	-	-	-	-	AF461325.1	-	-	-	-
D. jambulina	AY757284.1	AB669781.1	-	-	DQ363234.1	AF174489.1	AF393793.1	-	DQ363228.1	-	-	HQ631760.1	-	-	-	-
D. kikkawai	AB669734.1	AB669791.1	-	-	AB669864.1	U96156.3	AB077405.1	-	HQ631625.1	-	-	HQ631761.1	-	-	-	-
D. miranda	AF451104.1	M95148.1	-	EF216276.1	M60998.1	-	U31131.1	AY238807.1	AY754461.1	U47870.1	-	AY754537.1	-	-	-	-
D. narragansett	-	M95149.1	-	-	AB703323.1	-	AF312738.1	-	-	-	-		-	-	-	-
D. persimilis	AF451100.1	M95143.1	-	EF216278.1	M60997.1	AF129823.1	AF037103.1	L81264.1	-	U47873.1	-	AF461310.1	-	-	-	-
D. pseudoobscura	AB669765.1	AB669821.1	AF519380.1	EF216279.1	M60988.1	AF312739.1	HQ631488.1	X13878.1	AF293746.1	AF059882.1	-	HQ631745.1	-	-	-	-
D. tolteca	-	M95152.1	-	-	AB703325.1	AF306717.1	AF108131.1	-	-	U47867.1	-	AF461314.1	-	-	-	-
D. emarginata	AF045110.1	EU493764.1	EU493894.1	EU494148.1	AF045126.1	-	-	-	-	-	-		-	-	-	-
D. neocordata	AF045104.1	EU493765.1	EU493895.1	EU494149.1	HQ110514.1	AY736480.1	-	-	-	-	-		-	-	-	-
D. capricorni	AY335202.1	EU532079.1	EU493896.1	EU494150.1	AF264073.1	-	-	U51092.1	-	AY335228.1	-	EU532113.1	-	-	-	-
D. equinoxialis	U51593.1	EU493767.1	EU493897.1	EU494151.1	U95268.1	-	-	U51074.1	-	-	-	EU532101.1	-	-	-	-
D. nebulosa	JF735914.1	EU532083.1	-	EU494152.1	HQ110510.1	AY733060.1	-	U51090.1	AF293742.1	AF021830.1	-	EU532116.1	-	-	-	-
D. paulistorum	EU493641.1	HQ110557.1	EU493899.1	EU494153.1	U95272.1	-	-	U51082.1	AF293744.1	AF021829.1	-	EU532111.1	-	-	-	-
D. sucinea	AY335203.1	EU532094.1	-	EU494154.1	AF264080.1	-	-	-	-	AY335229.1	-	EU532114.1	-	-	-	-
H. duncani	JF735916.1	GU597505.1	GU597534.1	-	JF735886.1	-	-	-	-	-	-		-	-	-	-
H. pictiventris	-	AF478434.1	-	-	AB026530.1	AY736493.1	-	U11808.1	AF293736.1	AF021824.1	-		-	-	-	-
Sa. leonensis	EU493683.1	EU493812.1	EU493940.1	EU494185.1	-	EU161100.1	-	-	AF293748.1	-	-		-	-	-	-
Sc. latifasciaeformis	EU493684.1	EU493813.1	-	EU494186.1	-	GQ352255.1	AF071048.1	-	EU446102.1	-	-		-	-	-	-
Sc.lebanonensis	EU493686.1	HQ110572.1	-	EU494188.1	DQ155674.1	-	AB078774.1	-	AF293739.1	AF021822	-		-	-	-	-
Sc.pattersoni	EU493687.1	EU493816.1	DQ155680.1	EU494189.1	DQ155671.1	-	-	-	-	-	-		-	-	-	-
Sc. stonei	JF735922.1	JF735936.1	DQ155678.1	-	DQ155672.1	-	-	-	-	-	-		-	-	-	-
S. anomala	HQ170852.1	HQ170748.1	-	-	AB033647.1	-	-	-	-	-	-		-	-	-	-
Z. bogoriensis	FJ948762.1	GQ352278.1	-	-	-	AY736516.1	-	-	-	-	-		-	-	-	-
Z. ghesquierei	FJ948774.1	EF453719.1	GU597525.1	-	-	AY736518.1	-	-	-	-	-		-	-	-	-
Z. sepsoides	EU493690.1	EU493819.1	GU597526.1	EU494192.1	-	AY736523.1	U31153.1	-	-	-	-		-	-	-	-
Z. taronus	FJ948772.1	EF453705.1	-	-	-	EF458324.1	-	-	-	-	-		-	-	-	-
Z. tuberculatus	EU493691.1	EU595373.1	-	EU494193.1	X63955.1	AY736524.1	U31154.1	U11809.1	AF293751.1	AF021823	-	EU447345.1	-	-	-	-
Z. inermis	FJ948775.1	EF453712.1	-	-	-	AY736519.1	-	-	-	-	-		-	-	-	-
Z. kolodkinae	FJ948778.1	EF453715.1	-	-	-	AY736520.1	AF462593.1	-	-	-	-		-	-	-	-
Z. tsacasi	KC465964.1	EU595374.1	-	-	-	EF458325.1	-	-	-	-	-		-	-	-	-
Z. indianus	KF736195.1	EF632396.1	GU597527.1	-	-	EF458322.1	-	-	EU446103.1	-	-	EU447344.1	-	-	-	-
Z. lachaisei	FJ948766.1	EF453701.1	-	-	-	EF458330.1	-	-	-	-	-	-	-	-	-	-
